# Supplementary material for: High-entropy-doping effect in a rapid-charging lithium-ion anode Nb2O5
Source: Research Square preprint supplement (doi:10.21203/rs.3.rs-5237459/v1), 2024-11-08
Supplement: Supplementary file 1 [file 67de8af1c29cc2096643d1d9.docx]

**Supplementary**

**High-entropy-doping effect in a rapid-charging lithium-ion anode Nb2O5**

Junling Xu1*†, Fuqiang Xie1†, Lipeng Huang1, Nana Li2, Shang Peng2, Wensheng Ma3, Kai Zhang2, Yanxue Wu4, Lianyi Shao1, Xiaoyan Shi1, Jizhang Chen5, Li Tao6, Kai Zhang7, Zhonghua Zhang3, Yonggang Wang8*, Zhipeng Sun1*

1School of Materials and Energy, Guangdong University of Technology, Guangzhou 510006, China.

2Center for High Pressure Science and Technology Advanced Research (HPSTAR), Shanghai 201203, China.

3School of Materials Science and Engineering, Shandong University, Jinan 250061, China.

4Analysis and Test Center, Guangdong University of Technology, Guangzhou 510006, China.

5Co-Innovation Center of Efficient Processing and Utilization of Forest Resources, College of Materials Science and Engineering, Nanjing Forestry University, Nanjing 210037, China.

6Key Lab of Advanced Optoelectronic Quantum Architecture and Measurement (Ministry of Education), School of Physics, Beijing Institute of Technology, Beijing 100081, China.

7Frontiers Science Center for New Organic Matter, Renewable Energy Conversion and Storage Center (RECAST), Key Laboratory of Advanced Energy Materials Chemistry (Ministry of Education), College of Chemistry, Nankai University, Tianjin 300071, China.

8Department of Chemistry and Shanghai Key Laboratory of Molecular Catalysis and Innovative Materials, Institute of New Energy, iChEM (Collaborative Innovation Center of Chemistry for Energy Materials), Fudan University, Shanghai 200433, China.

†These authors contributed equally to this work.

Email: [jlxu@gdut.edu.cn (Junling](mailto:jlxu@gdut.edu.cn%20(Junling) Xu); [ygwang@fudan.edu.cn](mailto:ygwang@fudan.edu.cn) (Yonggang Wang); [zpsunxj@gdut.edu.cn](mailto:zpsunxj@gdut.edu.cn) (Zhipeng Sun)

Supplementary Table S1 | The samples and corresponding doping elements for Nb2O5 (red items refer to HED-Nb2O5).

| **Samples** | **The doping elements** |
| --- | --- |
| **N1C1** | Mg |
| **N1C3** | Mg |
| **N3C1** | Mo、In、Y |
| **N3C8** | Mn、Mg、Cr |
| **N5C1** | Zn、Mg、Ca、Cr、Al |
| **N5C3** | Zn、Mg、Ca、Cr、Al |
| **N5C5** | Mn、Fe、Co、Ni、Cu |
| **N5C5’** | Zn、Mg、Ca、Cr、Al |
| **N5C5’’** | Sn、Ca、Sr、Ba、Ce |
| **N5C10** | Mn、Fe、Co、Ni、Cu |
| **N5C15** | Mn、Fe、Co、Ni、Cu |
| **N6C6** | Zn、Mg、Ca、Cr、Al、Mo |
| **N6C15** | Mn、Fe、Co、Ni、Cu、Cr |
| **N6C18** | Mn、Fe、Co、Ni、Cu、Cr |
| **N6C30** | Mn、Fe、Co、Ni、Cu、Cr |
| **N7C1** | Zn、Mg、Ca、Cr、Al、Y、In |
| **N7C3** | Zn、Mg、Ca、Cr、Al、Mn、In |
| **N7C8** | Zn、Mg、Ca、Cr、Al、Mo、La |
| **N8C2** | Zn、Mg、Ca、Cr、Al、In、Y、La |
| **N10C1** | Zn、Mg、Ca、Cr、Al、Sn、Ca、Sr、Ba、Ce |
| **N10C3** | Zn、Mg、Ca、Cr、Al、Sn,、Ca、Sr、Ba、Ce |
| **N10C5** | Zn、Mg、Ca、Cr、Al、Sn、Ca、Sr、Ba、Ce |
| **N10C9** | Zn、Mg、Ca、Cr、Al、Sn、Ca、Sr、Ba、Ce |
| **N10C12** | Zn、Mg、Ca、Cr、Al、Sn、Ca、Sr、Ba、Ce |
| **N10C15** | Mn、Fe、Co、Ni、Cu、Zn、Mg、Ca、Sr、Al |
| **N11C2** | Zn、Mg、Ca、Cr、Al、Sn、Ca、Sr、Ba、Ce、La |
| **N12C1** | Zn、Mg、Ca、Cr、Al、Sn、Ca、Sr、Ba、Ce、Mo、In |
| **N12C3** | Zn、Mg、Ca、Cr、Al、Sn、Ca、Sr、Ba、Ce、Mo、In |
| **N12C4** | Zn、Mg、Ca、Cr、Al、Sn、Ca、Sr、Ba、Ce、Mo、In |
| **N12C5** | Zn、Mg、Ca、Cr、Al、Sn、Ca、Sr、Ba、Ce、Mo、In |
| **N12C8** | Zn、Mg、Ca、Cr、Al、Sn、Ca、Sr、Ba、Ce、Mo、La |
| **N13C2** | Zn、Mg、Ca、Cr、Al、Sn、Ca、Sr、Ba、Ce、Mo、Y、La |
| **N13C3** | Zn、Mg、Ca、Cr、Al、Sn、Ca、Sr、Ba、Ce、Mo、Y、La |
| **N14C1** | Zn、Mg、Ca、Cr、Al、Sn、Ca、Sr、Ba、Ce、Mo、In、Y、La |
| **N14C4** | Zn、Mg、Ca、Cr、Al、Sn、Ca、Sr、Ba、Ce、Mo、In、Y、La |
| **N15C1** | Mn、Fe、Co、Ni、Cu、Zn、Mg、Ca、Sr、Al、Zn、Ga、Sr、Ba、Ce |
| **N15C3** | Mn、Fe、Co、Ni、Cu、Zn、Mg、Ca、Sr、Al、Zn、Ga、Sr、Ba、Ce |
| **N15C3’** | Zn、Mg、Ca、Cr、Al、Sn、Ca、Sr、Ba、Ce、Mo、Sb、In、Y、La |
| **N15C5** | Mn、Fe、Co、Ni、Cu、Zn、Mg、Ca、Sr、Al、Zn、Ga、Sr、Ba、Ce |
| **N15C9** | Mn、Fe、Co、Ni、Cu、Zn、Mg、Ca、Sr、Al、Zn、Ga、Sr、Ba、Ce |
| **N15C10** | Mn、Fe、Co、Ni、Cu、Zn、Mg、Ca、Sr、Al、Zn、Ga、Sr、Ba、Ce |
| **N16C2** | Mn、Fe、Co、Ni、Cu、Zn、Mg、Ca、Sr、Al、Zn、Ga、Sr、Ba、Ce、La |
| **N16C3** | Mn、Fe、Co、Ni、Cu、Zn、Mg、Ca、Sr、Al、Zn、Ga、Sr、Ba、Ce、La |
| **N17C1** | Mn、Fe、Co、Ni、Cu、Zn、Mg、Ca、Sr、Al、Zn、Ga、Sr、Ba、Ce、In、Y |
| **N17C3** | Mn、Fe、Co、Ni、Cu、Zn、Mg、Ca、Sr、Al、Zn、Ga、Sr、Ba、Ce、Mo、In |
| **N17C7** | Mn、Fe、Co、Ni、Cu、Zn、Mg、Ca、Sr、Al、Zn、Ga、Sr、Ba、Ce、Y、In |
| **N19C5** | Mn、Fe、Co、Ni、Cu、Zn、Mg、Ca、Sr、Al、Zn、Ga、Sr、Ba、Ce、Mo、In、Y、La |
| **N20C1** | Mn、Fe、Co、Ni、Cu、Zn、Mg、Ca、Sr、Al、Zn、Ga、Sr、Ba、Ce、Mo、Sb、In、Y、La |
| **N20C3** | Mn、Fe、Co、Ni、Cu、Zn、Mg、Ca、Sr、Al、Zn、Ga、Sr、Ba、Ce、Mo、Sb、In、Y、La |
| **N20C10** | Mn、Fe、Co、Ni、Cu、Zn、Mg、Ca、Sr、Al、Zn、Ga、Sr、Ba、Ce、Mo、Sb、In、Y、La |


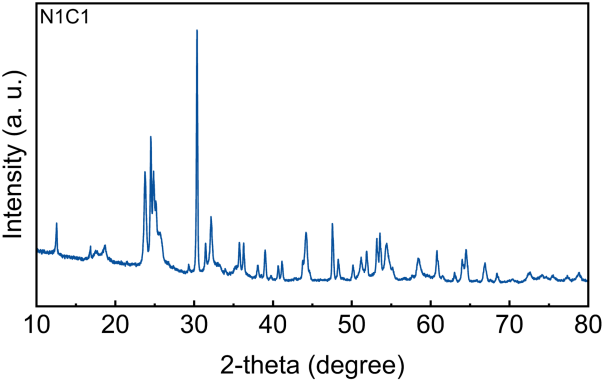

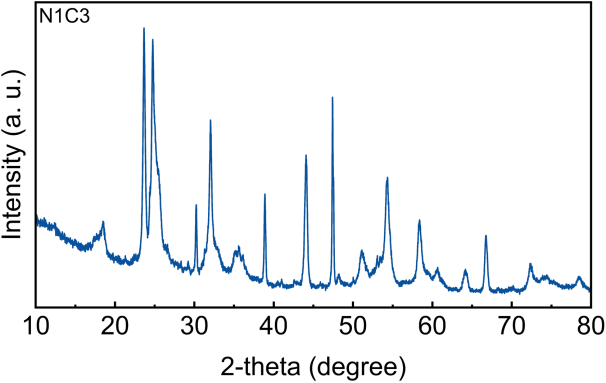


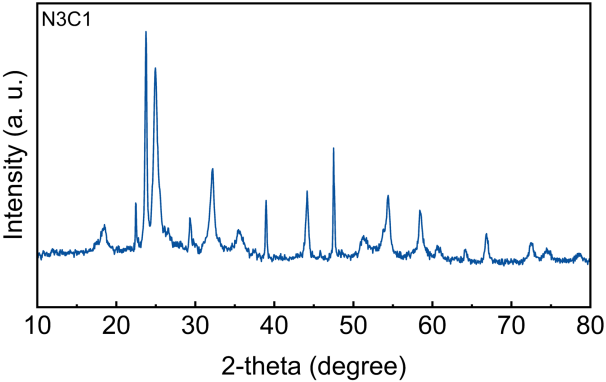

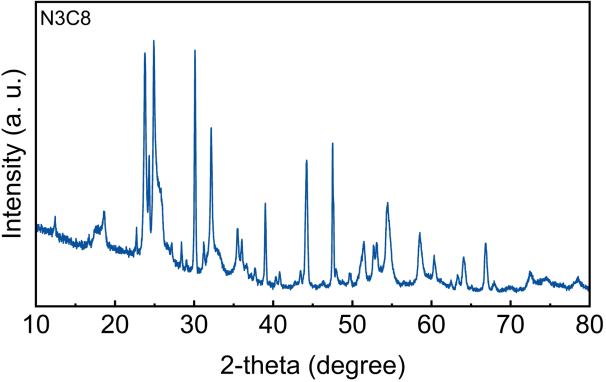


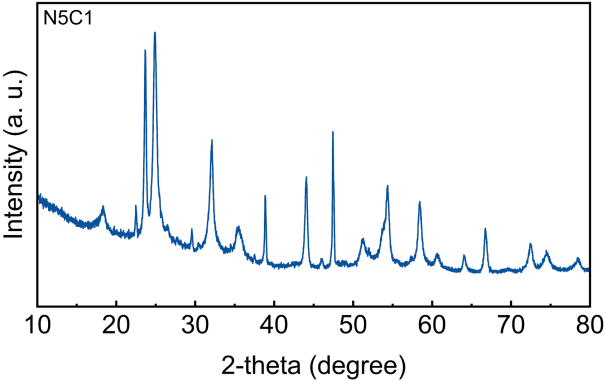

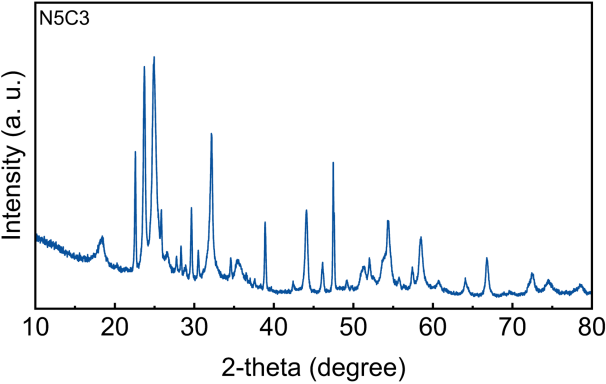

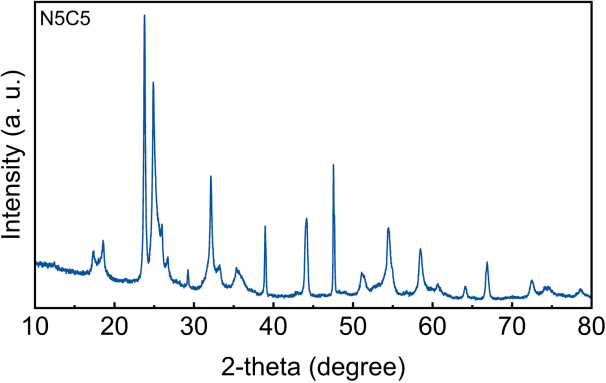

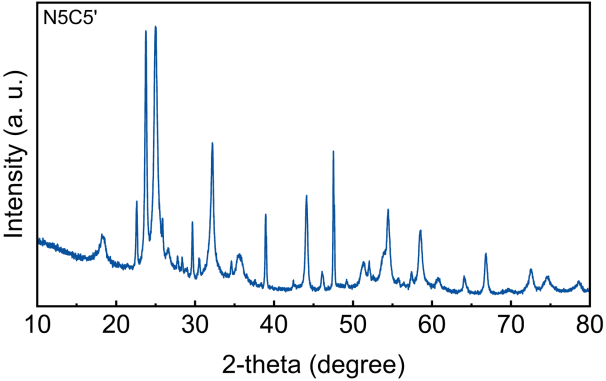


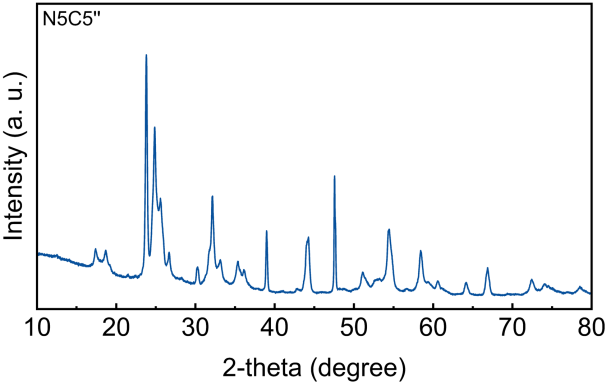

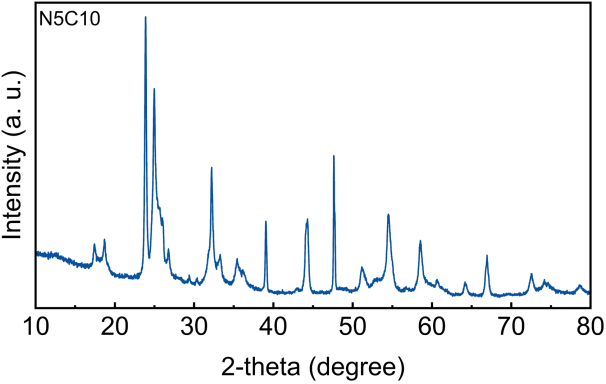


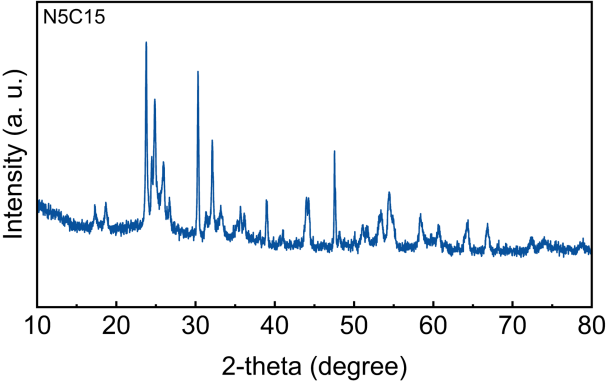

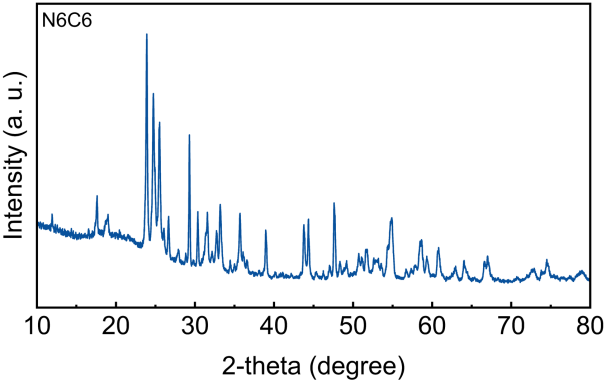

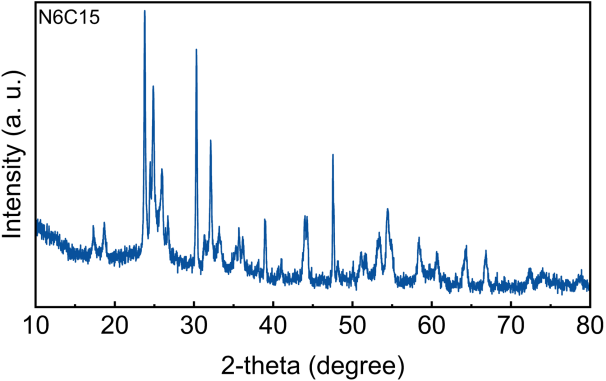

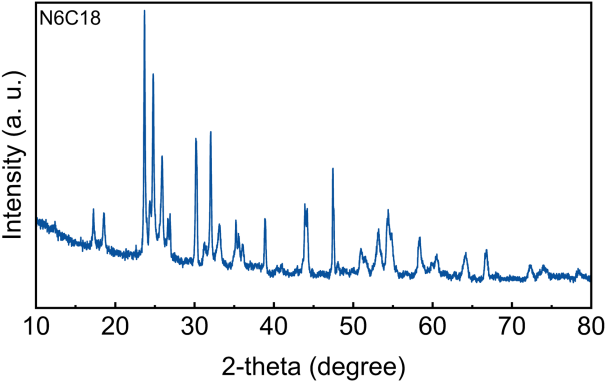


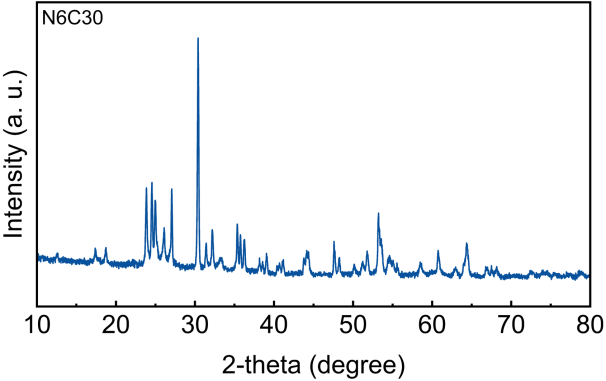

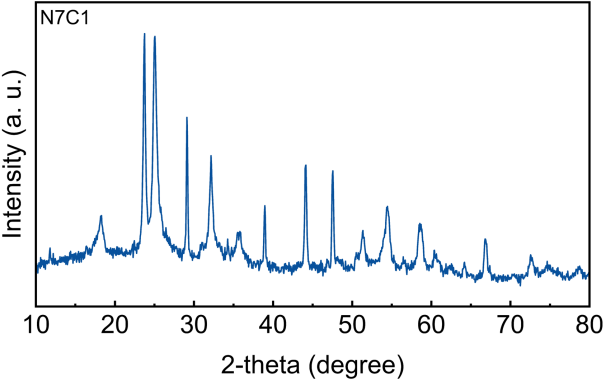


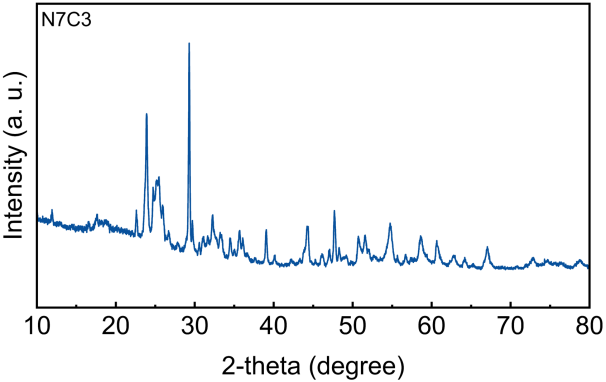

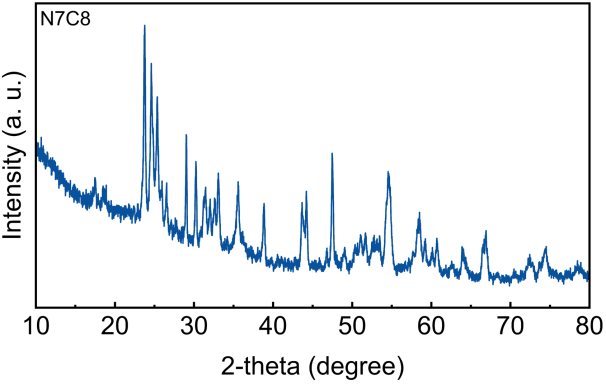

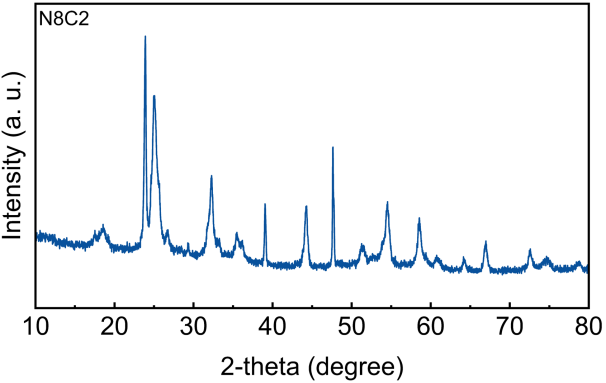

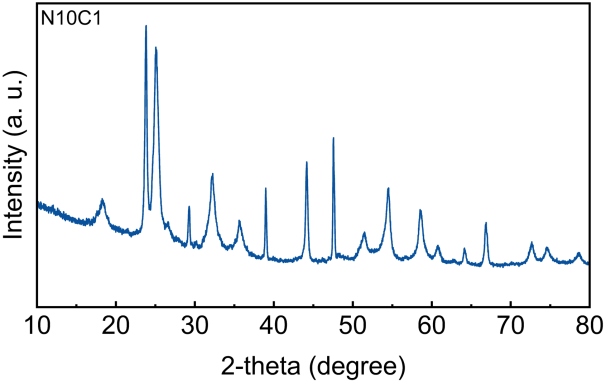


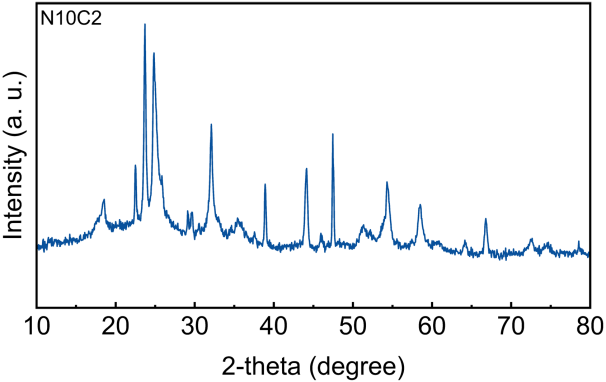

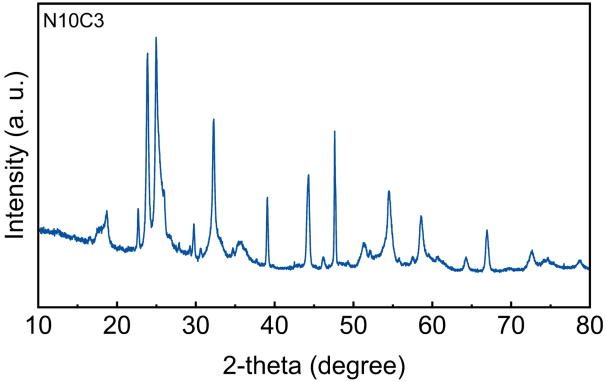

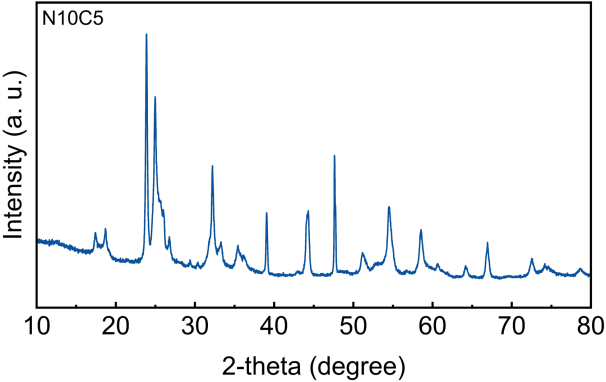

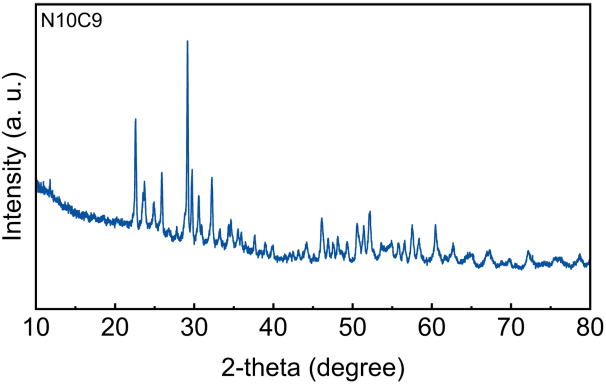

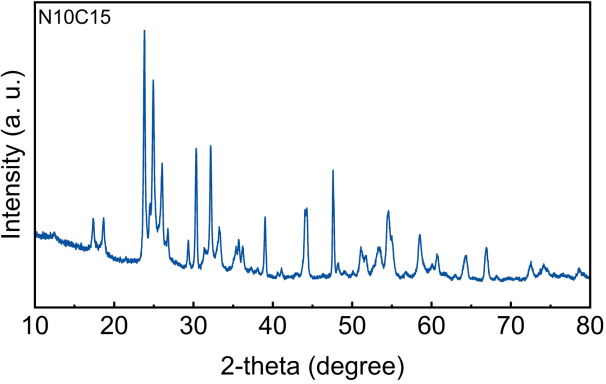

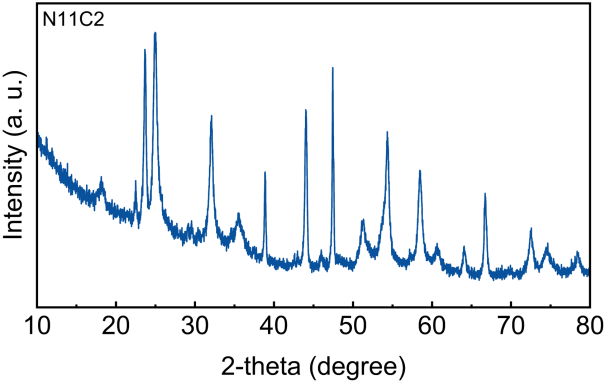


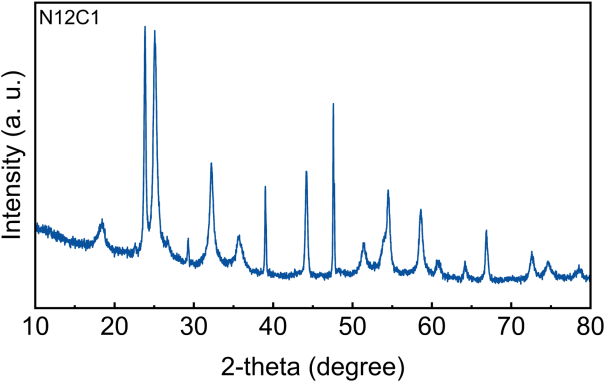

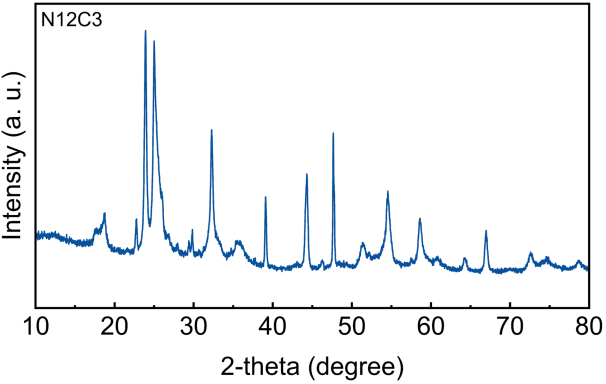


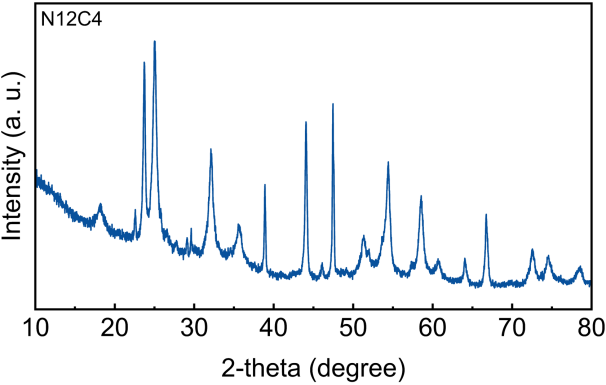

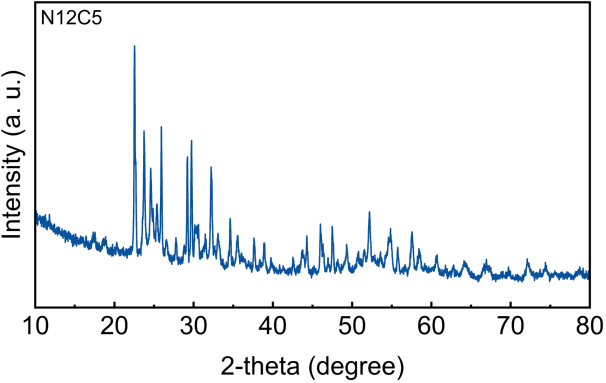


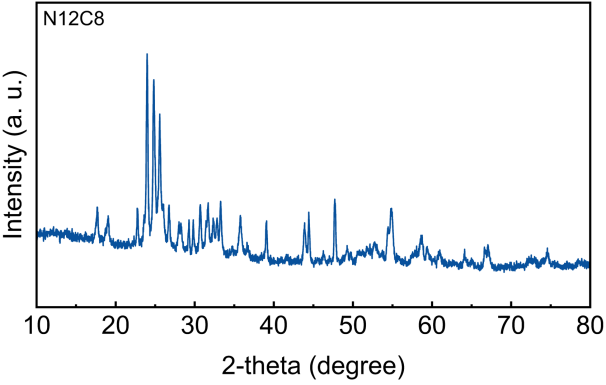

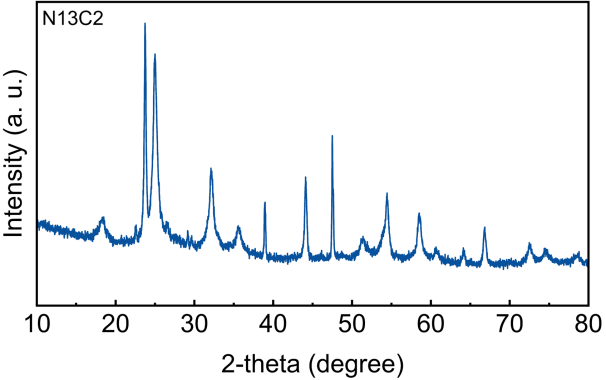


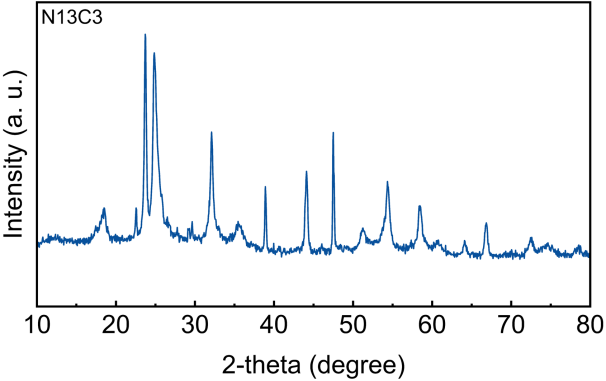

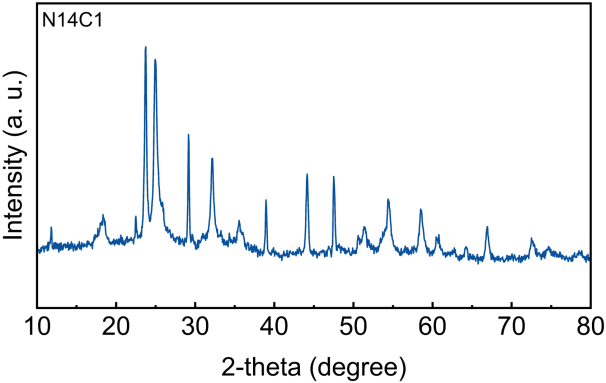


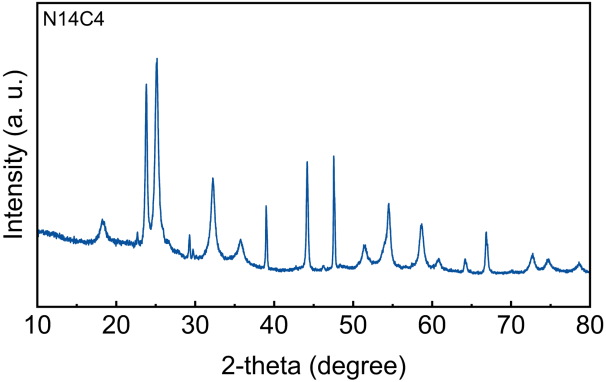

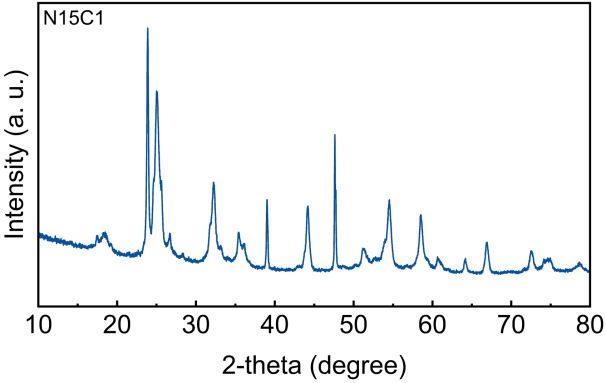


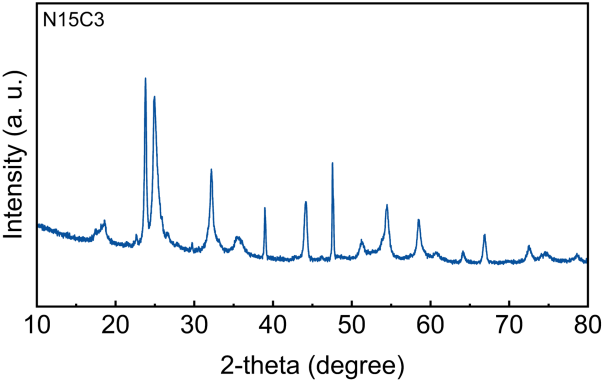

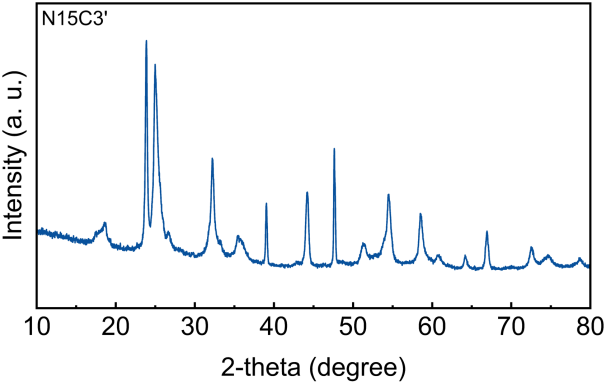


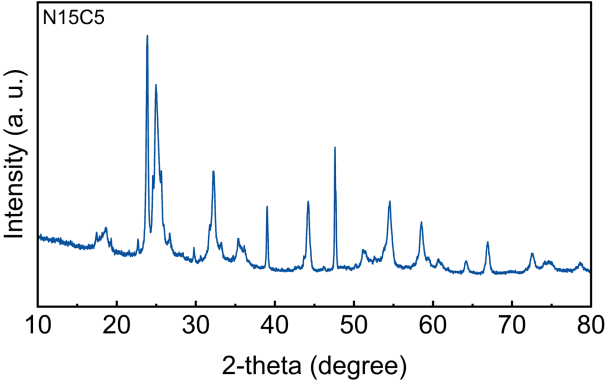

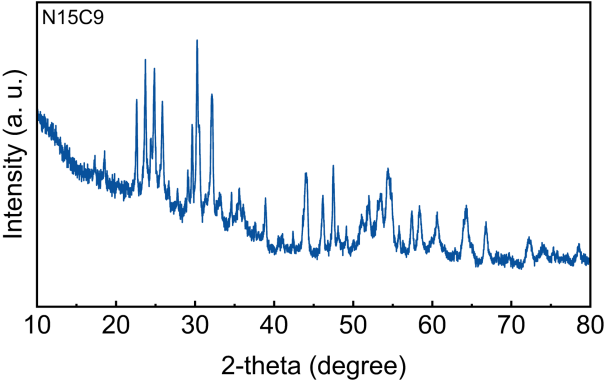


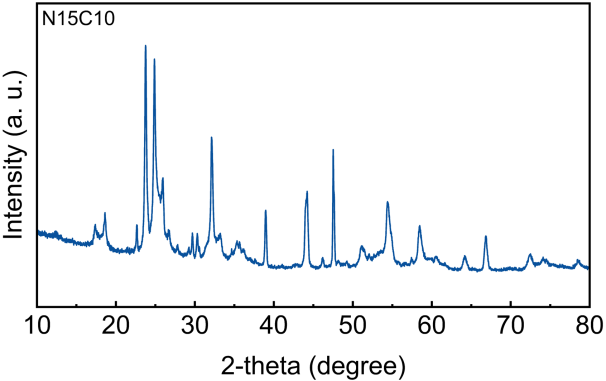

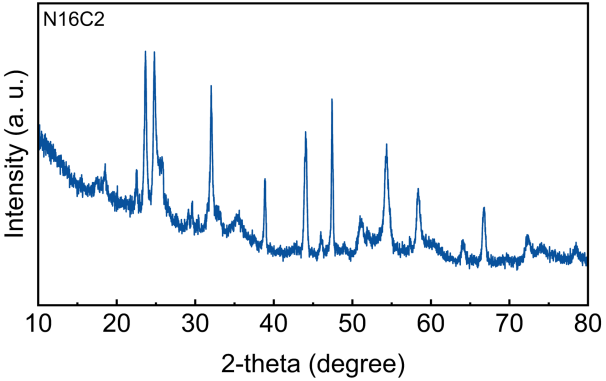


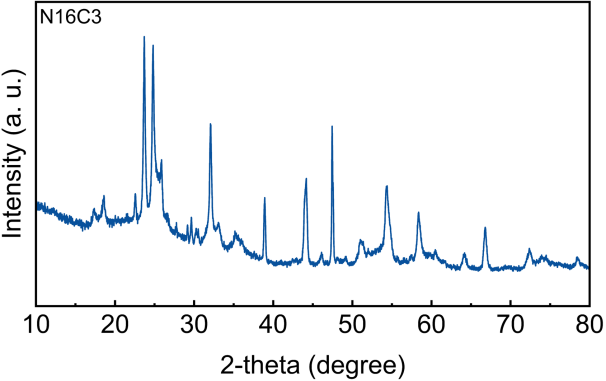

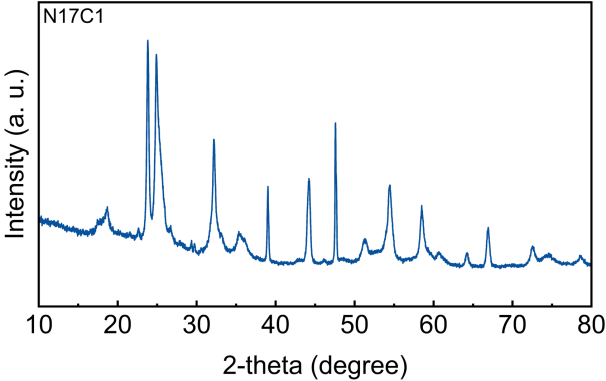


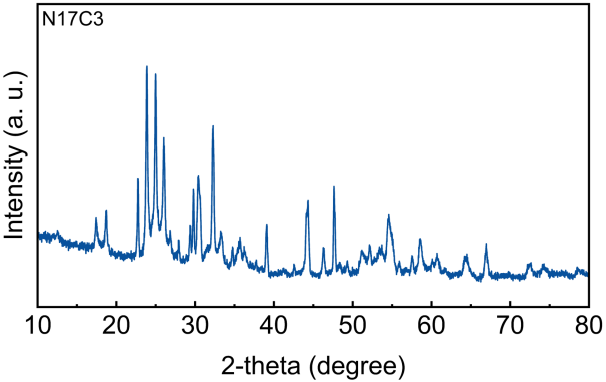

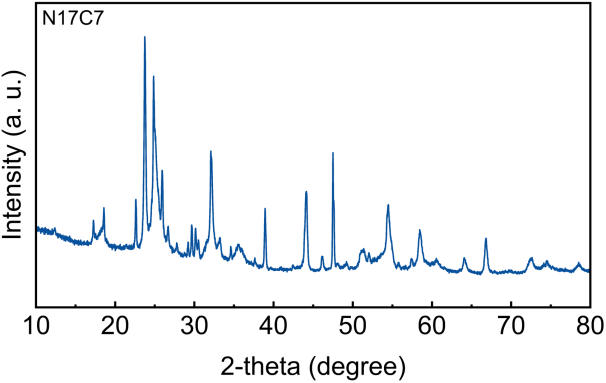

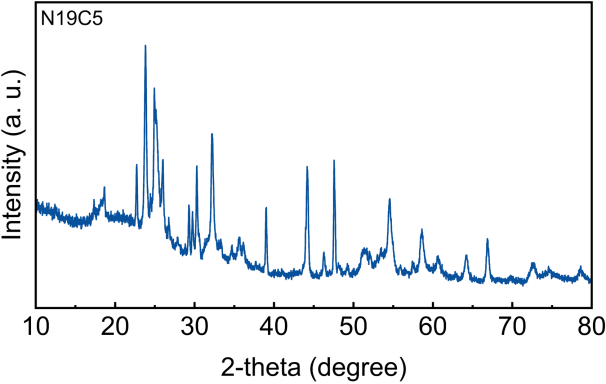

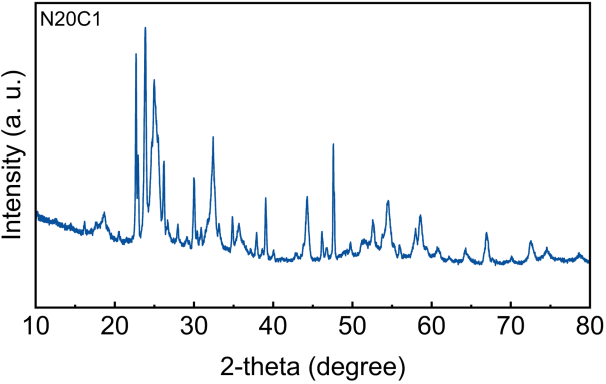


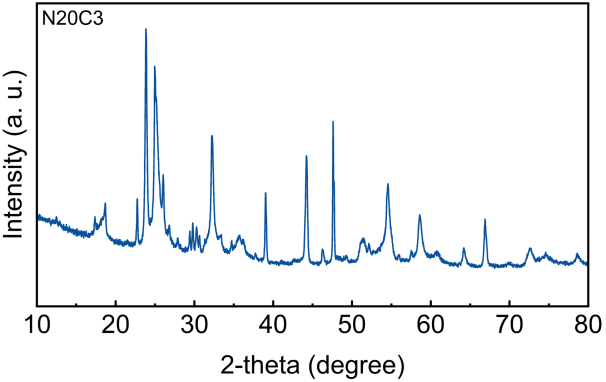

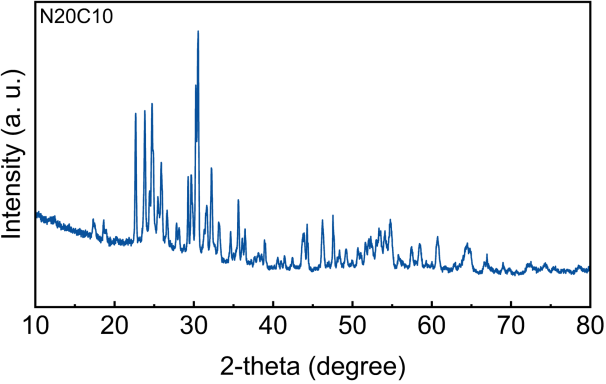


Fig. S1. The XRD patterns of doped Nb2O5 with different numbers (N) and concentrations (C) of doping elements.


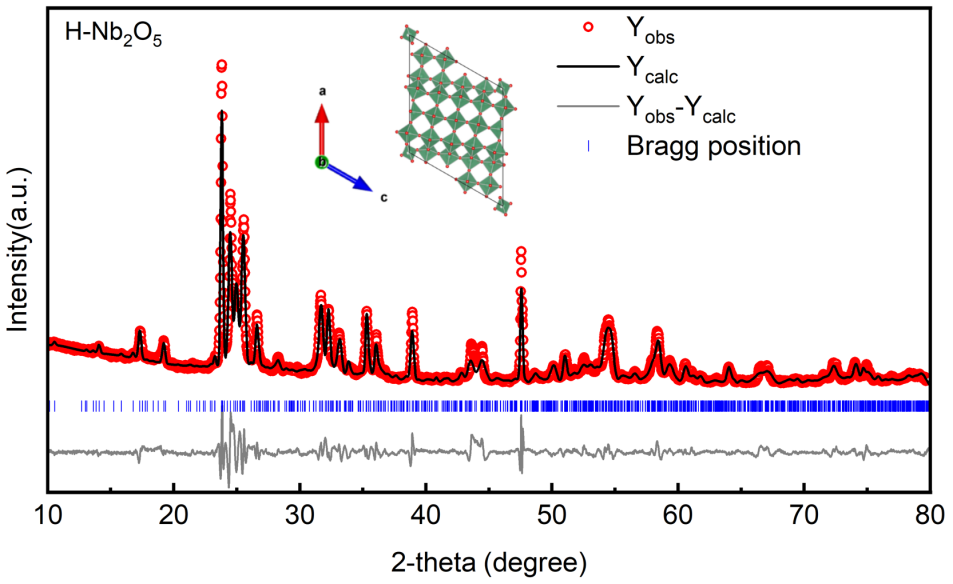

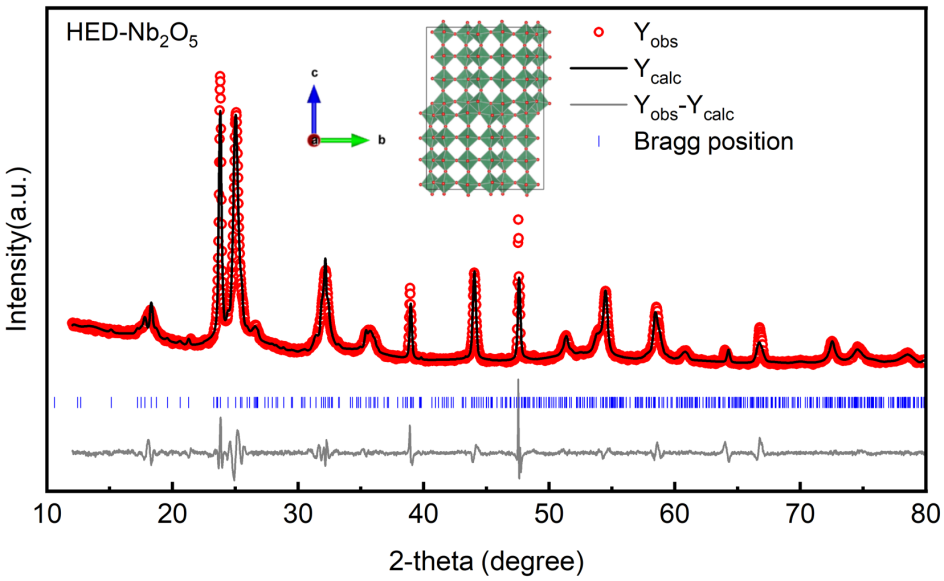


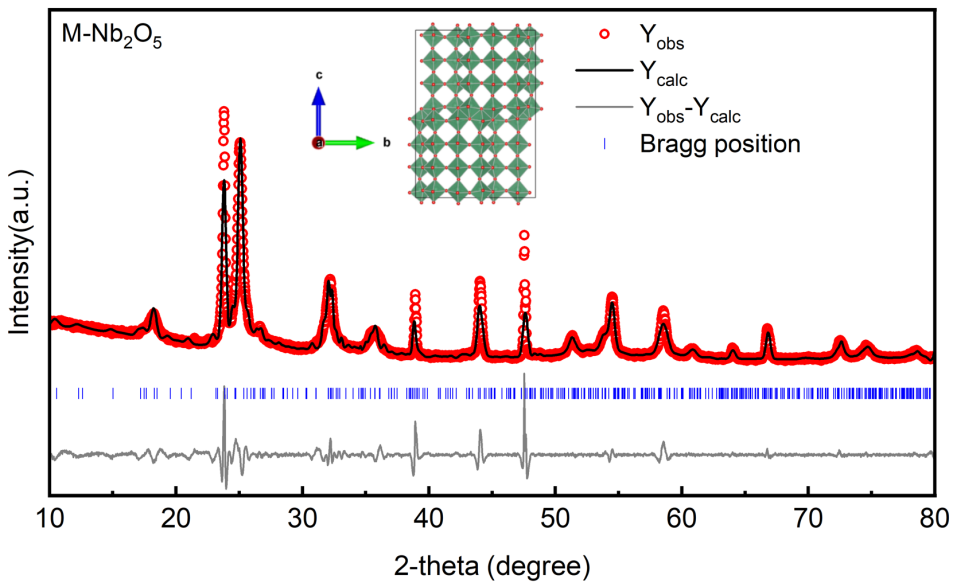


Fig. S2. Rietveld refinement of XRD patterns of H-Nb2O5, HED(N15C3)-Nb2O5 and M-Nb2O5.


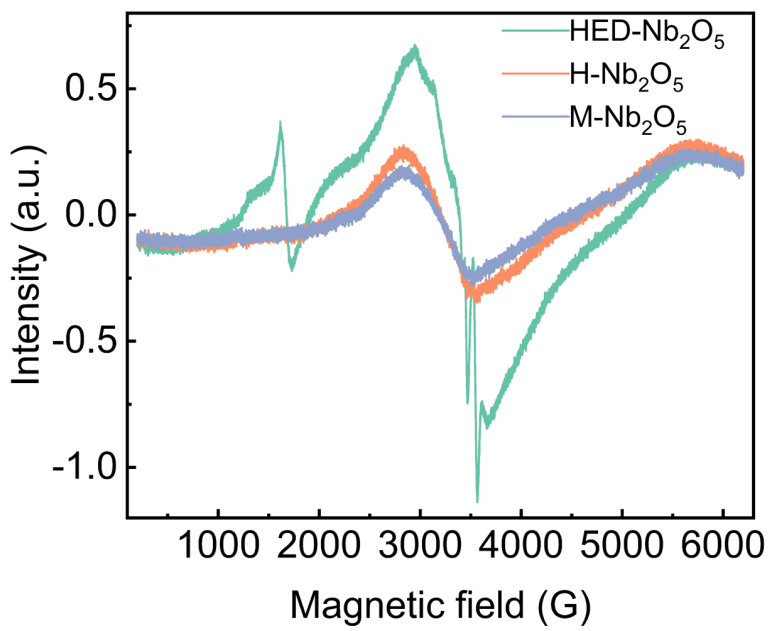


Fig. S3. EPR spectra of HED(N15C3)-Nb2O5, H-Nb2O5 and M-Nb2O5.


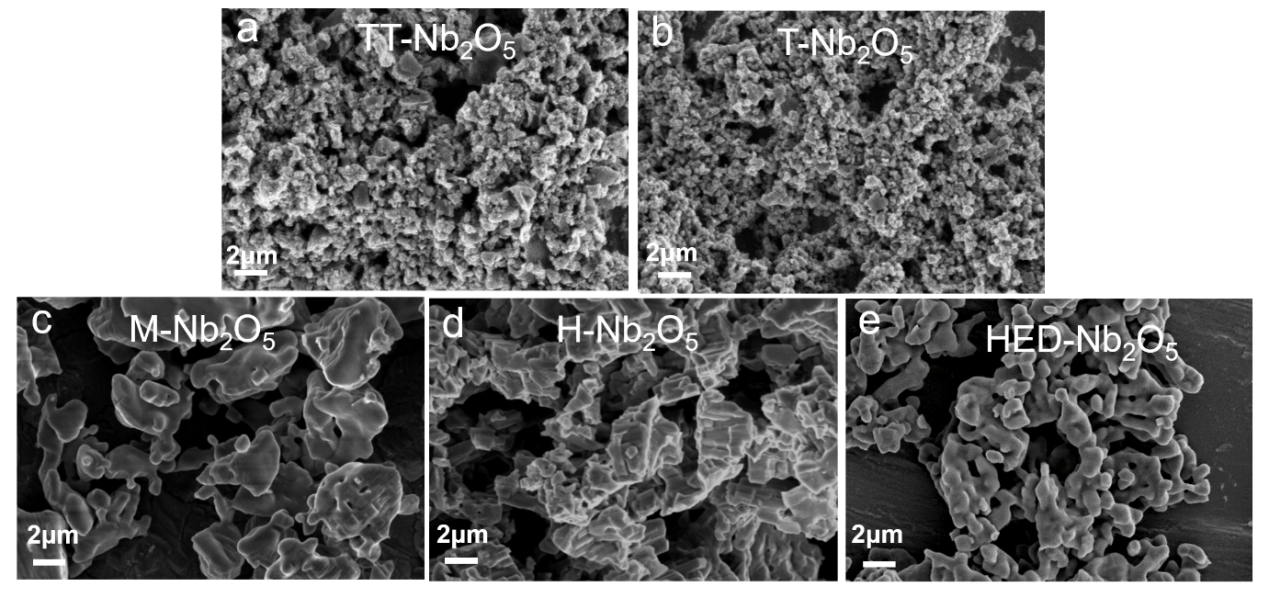


Fig. S4. The SEM images of (a) TT-, (b) T-, (c) M-, (d) H-, and (e) HED(N15C3)-Nb2O5 .


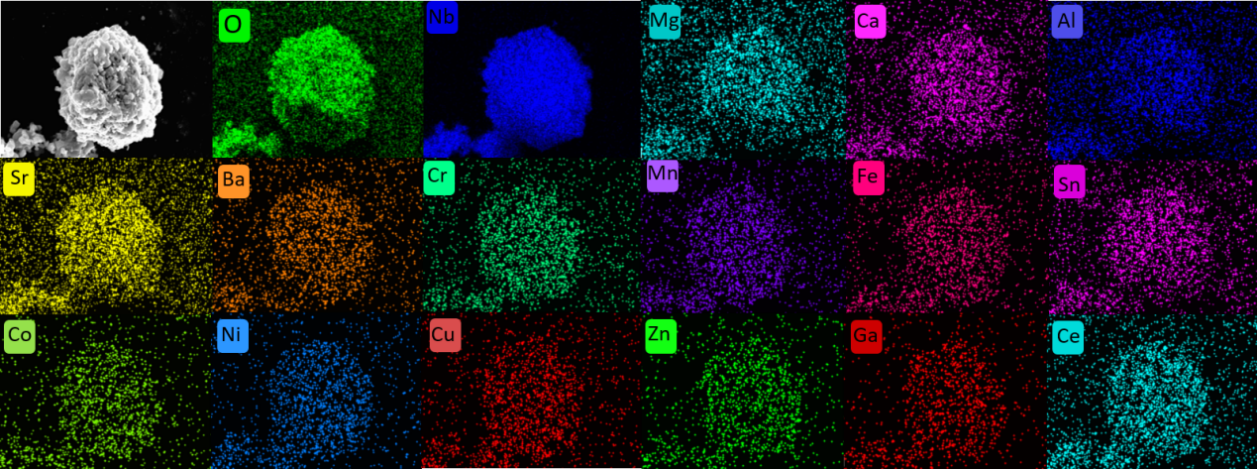


Fig. S5. The SEM-EDS mapping of HED(N15C3)-Nb2O5 .


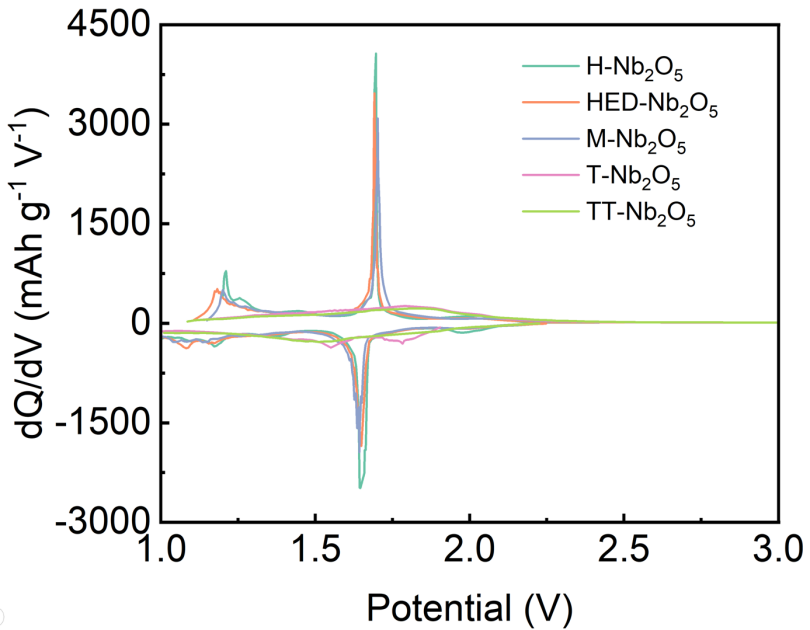


Fig. S6：The comparison of dQ/dV curves of niobium oxides at 0.5C.


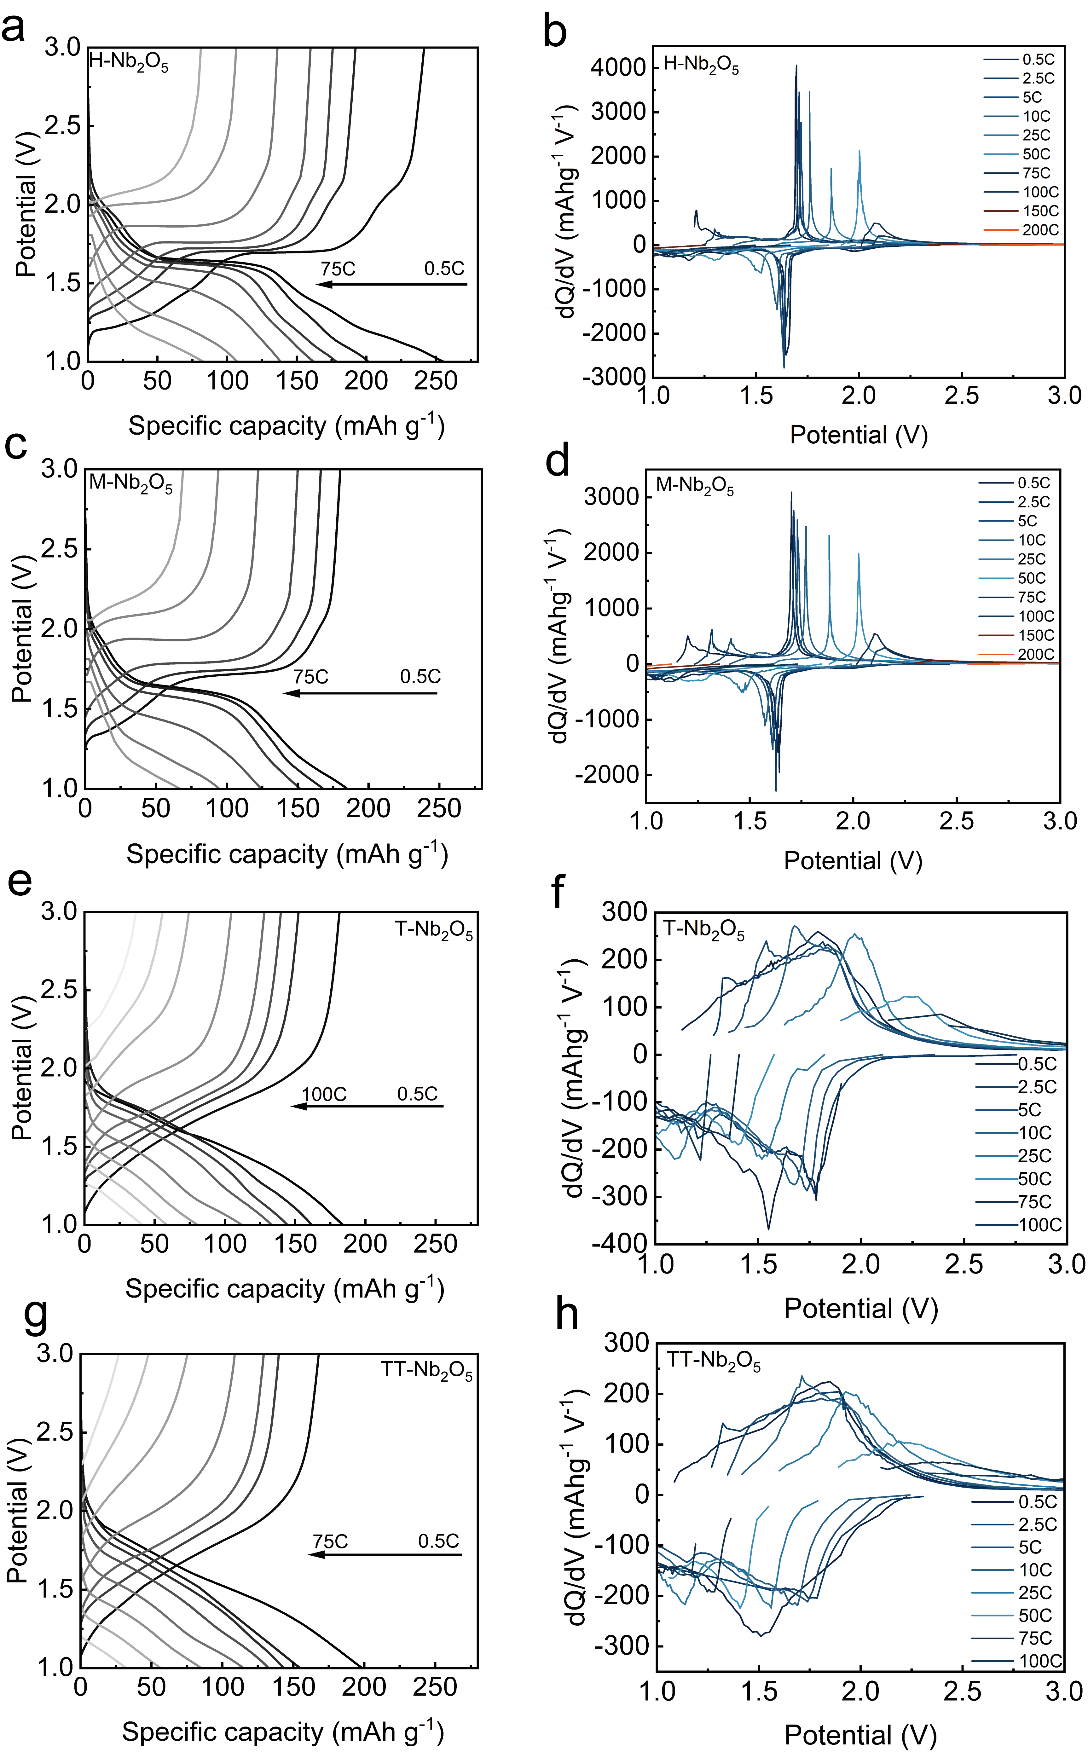


Fig. S7. The charge/discharge curves and dQ/dV curves of niobium oxides at different scan rates.


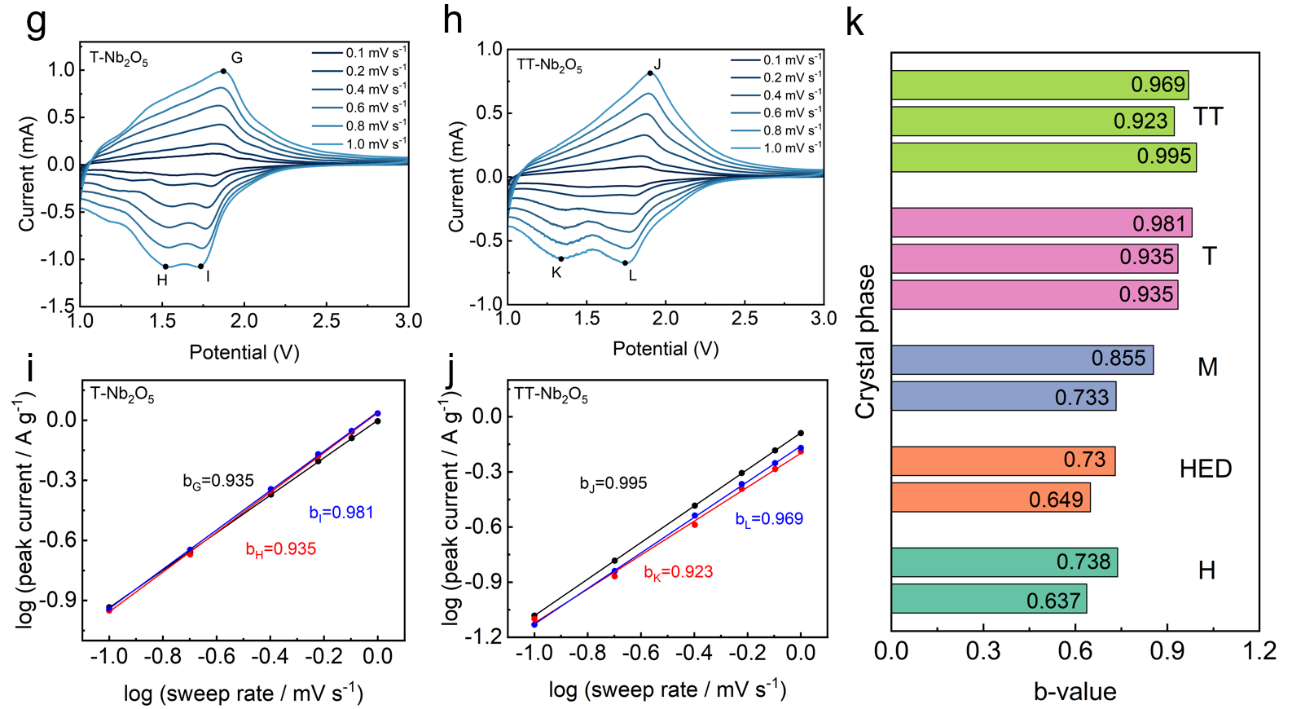

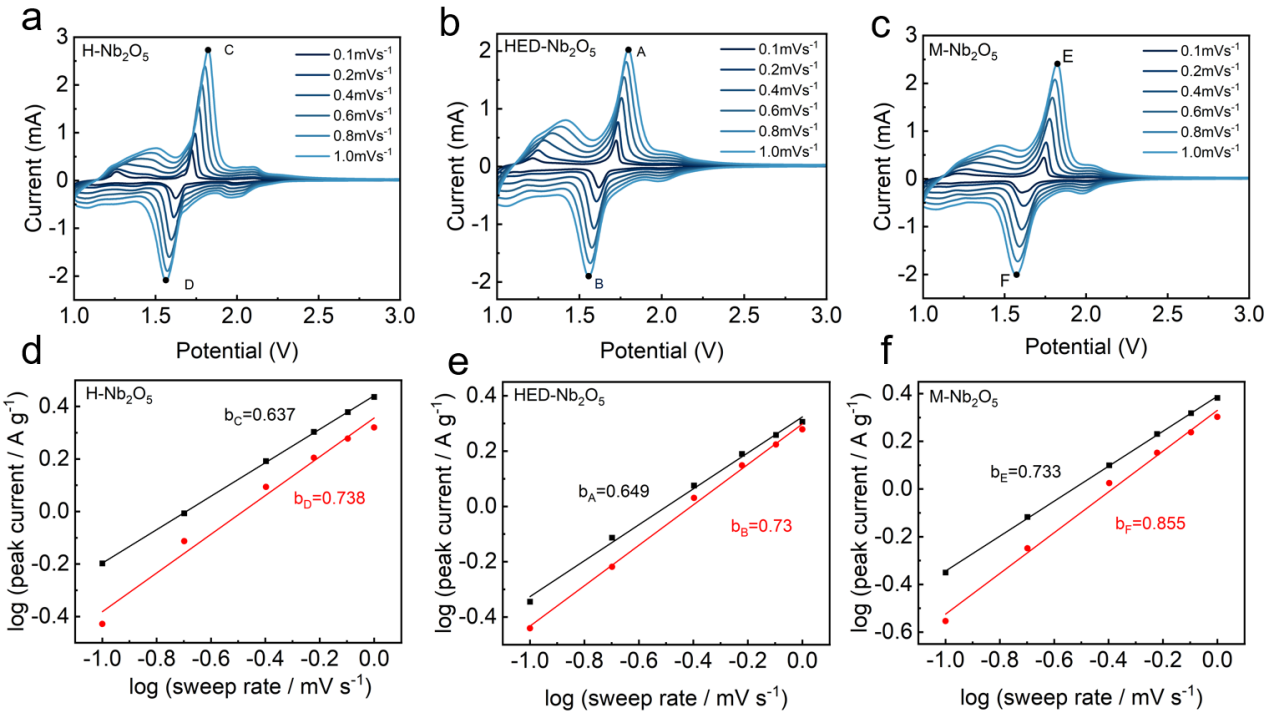


Fig. S8. CV curves and their corresponding power law fits of niobium oxides for each redox peaks.
